# Supplementary material for: Platform-independent estimation of human physiological time from single blood samples
Source: PubMed Central journal article supplement — Proc Natl Acad Sci U S A. 2024 Jan 8;121(3):e2308114120. doi: 10.1073/pnas.2308114120 (PMC10801856; doi:10.1073/pnas.2308114120), 2024-01-08
Supplement: pnas.2308114120.sapp.pdf [file pnas.2308114120.sapp.pdf]

# PNAS

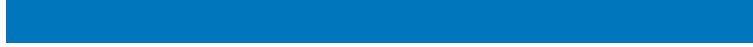

1

## 2 **Supporting Information for**

### 3 **Platform-independent estimation of human physiological time from single blood samples**

4 **Yitong Huang and Rosemary Braun**

5 **Rosemary Braun**

6 **E-mail: [rbraun@northwestern.edu](mailto:rbraun@northwestern.edu)**

#### 7 **This PDF file includes:**

8 Figs. S1 to S3

9 Tables S1 to S3

10 SI References

| Genes    | ZeitZeiger | PLSR | TimeSignature | Genes    | ZeitZeiger | PLSR | TimeSignature |
|----------|------------|------|---------------|----------|------------|------|---------------|
| DDIT4    | X          | X    | X             | HMGCS1   |            |      | X             |
| GHRL     |            |      | X             | FOSL2    | X          |      | X             |
| PER1     | X          | X    | X             | ADAT2    |            | X    |               |
| EPHX2    |            |      | X             | ABCB1    |            | X    |               |
| GNG2     |            |      | X             | HSBP1L1  |            | X    |               |
| IL1B     |            | X    | X             | TBX21    |            | X    |               |
| DHRS13   |            | X    | X             | ZNF101   |            | X    |               |
| NR1D1    |            |      | X             | SDF2     |            | X    |               |
| ZNF438   |            | X    | X             | PHF21A   | X          | X    |               |
| NR1D2    | X          | X    | X             | SMAP2    | X          | X    |               |
| CD38     |            |      | X             | ZNF397   |            | X    |               |
| TIAM2    |            |      | X             | MGST1    |            | X    |               |
| CD1C     |            | X    | X             | AMD1     |            | X    |               |
| LLGL2    |            | X    | X             | NUCKS1   |            | X    |               |
| GZMB     | X          | X    | X             | FGFBP2   |            | X    |               |
| CLEC10A  |            |      | X             | BACH1    |            | X    |               |
| PK1      |            | X    | X             | UBE2B    |            | X    |               |
| GPCPD1   |            | X    | X             | MAPK8    |            | X    |               |
| MUM1     |            |      | X             | SESN2    |            | X    |               |
| STIP1    |            | X    | X             | ITGA6    |            | X    |               |
| CHSY1    |            |      | X             | NDFIP1   |            | X    |               |
| AK5      |            |      | X             | CD82     |            | X    |               |
| CYB561   |            |      | X             | RNF144B  |            | X    |               |
| SLP1     |            |      | X             | IRS2     | X          | X    |               |
| PARP2    |            |      | X             | SUGT1    |            | X    |               |
| PGPEP1   |            |      | X             | CDC42EP2 |            | X    |               |
| C12orf75 |            |      | X             | GNL1     |            | X    |               |
| FKBP4    |            | X    | X             | ICAM1    |            | X    |               |
| CAMKK1   | X          | X    | X             | AVIL     |            | X    |               |
| DTYMK    |            |      | X             | STAU2    |            | X    |               |
| NPEPL1   |            |      | X             | TXNL4B   |            | X    |               |
| MS4A3    |            |      | X             | SH2D2A   |            | X    |               |
| IL13RA1  | X          |      | X             | CHN2     |            | X    |               |
| ID3      |            |      | X             | GOLPH3L  |            | X    |               |
| MEGF6    |            | X    | X             | FAM127A  |            | X    |               |
| TCN1     |            |      | X             | HSPA8    |            | X    |               |
| NSUN3    |            |      | X             | PARD6A   |            | X    |               |
| POLH     |            |      | X             | CAPN7    |            | X    |               |
| SYT11    |            | X    | X             | ABI2     |            | X    |               |
| SH2D1B   |            | X    | X             | TRIM8    |            | X    |               |
| REM2     |            |      | X             | STMN3    |            | X    |               |
| RBM3     |            | X    |               | PRR14    |            | X    |               |
| FKBP5    | X          | X    |               | TIGIT    |            | X    |               |
| S1PR5    |            | X    |               | PPP2R2B  |            | X    |               |
| CXCR4    |            | X    |               | TMEM79   |            | X    |               |
| ZNF276   |            | X    |               | FUS      |            | X    |               |
| ERLIN1   |            | X    |               | CASP4    |            | X    |               |
| MKNK2    |            | X    |               | FAM198B  |            | X    |               |
| SAMD3    |            | X    |               | HSPD1    |            | X    |               |
| DUSP1    | X          | X    |               | TIMELESS |            | X    |               |
| SERTAD1  |            | X    |               | TRA2A    |            | X    |               |
| PDIA5    |            | X    |               | CIAPIN1  |            | X    |               |
| HSPH1    |            | X    |               | SFXN2    |            | X    |               |
| IL6ST    |            | X    |               | STEAP4   |            | X    |               |
| TP53BP1  |            | X    |               | ERP27    |            | X    |               |
| SYTL2    |            | X    |               | DYNLL1   |            | X    |               |
| ODF2     |            | X    |               | NELL2    | X          |      |               |
| CD36     |            | X    |               | CLEC4E   | X          |      |               |
| PRRG4    | X          | X    |               | CBX5     | X          |      |               |
| CCDC117  |            | X    |               | FBP1     | X          |      |               |
| C1orf21  |            | X    |               | HUWE1    | X          |      |               |
| NUDT5    |            | X    |               | TTLL4    | X          |      |               |
| TLR2     |            | X    |               | KIAA0922 | X          |      |               |
| MED23    |            | X    |               | CDK11B   | X          |      |               |
| MPPE1    |            | X    |               | OSBP     | X          |      |               |
| IMPAD1   |            | X    |               | KPNA6    | X          |      |               |
| SLC39A11 |            | X    |               | RELA     | X          |      |               |
| CXorf65  |            | X    |               |          |            |      |               |

Table S1. Predictor genes identified by ZeitZeiger (1), the PLSR-based method (2), and TimeSignature (3). x marks the predictor gene identified by each algorithm when applied to the same training set from TrTe, resulting in a total union of 135 genes.

|         |        |          |        |        |        |         |
|---------|--------|----------|--------|--------|--------|---------|
| SERTAD1 | ZNF101 | PHF21A   | STMN3  | GNG2   | IL1B   | IL13RA1 |
| NR1D1   | IRS2   | FKBP5    | ID3    | UBE2B  | ZNF438 | CLEC4E  |
| ITGA6   | DDIT4  | DUSP1    | STEAP4 | GHRL   | NR1D2  | NELL2   |
| AK5     | FOSL2  | DHRS13   | MPPE1  | CYB561 | CAMKK1 | PER1    |
| AVIL    | SMAP2  | CDC42EP2 | NUDT5  | EPHX2  | MKNK2  | SFXN2   |
| SESN2   | PRRG4  |          |        |        |        |         |

**Table S2.** A set of 37 predictor genes used in TimeMachine, which is selected by applying *JTK\_Cycle* (4, 5) to the 135 genes in Supplementary Table S1.

|                           | Dataset | Proportion of samples within $\pm 2$ hr error |       |       | Proportion of samples within $\pm 4$ hr error |       |       |
|---------------------------|---------|-----------------------------------------------|-------|-------|-----------------------------------------------|-------|-------|
|                           |         | rTM                                           | zTM   | PLSR  | rTM                                           | zTM   | PLSR  |
| Predicting Circadian Time | TrTe    | 55.7%                                         | 57.3% | 47.0% | 83.8%                                         | 83.8% | 83.8% |
|                           | V1      | 39.5%                                         | 34.9% | 39.5% | 65.9%                                         | 66.3% | 64.7% |
|                           | V3      | 50.3%                                         | 52.9% | 40.5% | 78.4%                                         | 79.7% | 80.4% |
| Predicting Local Time     | TrTe    | 51.2%                                         | 47.4% | 35.2% | 75.6%                                         | 75.1% | 62.9% |
|                           | V1      | 39.2%                                         | 37.4% | 28.0% | 69.2%                                         | 66.4% | 55.6% |
|                           | V2      | 47.4%                                         | 46.2% | 37.3% | 75.1%                                         | 71.1% | 59.8% |
|                           | V3      | 41.8%                                         | 36%   | 41.1% | 68%                                           | 59.5% | 62.7% |

**Table S3. Performance of algorithms on predicting circadian phase and local time in four distinct validation sets.**

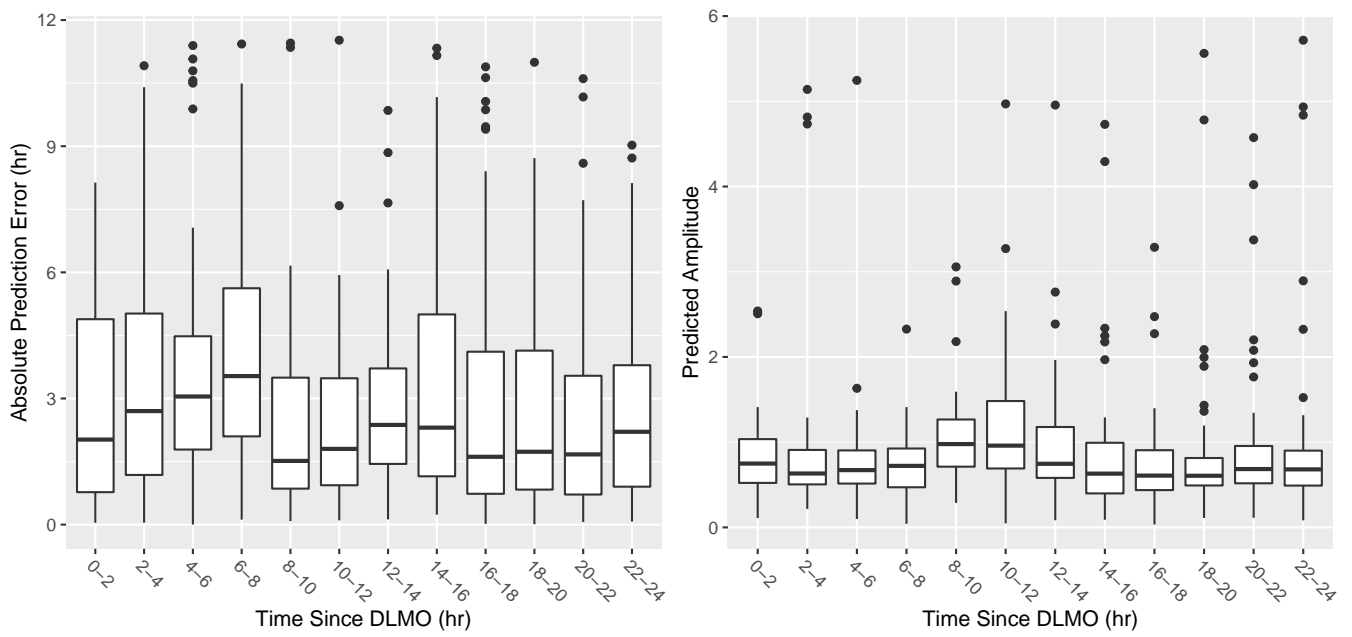

Fig. S1. ratio TimeMachine's performance with respect to time.

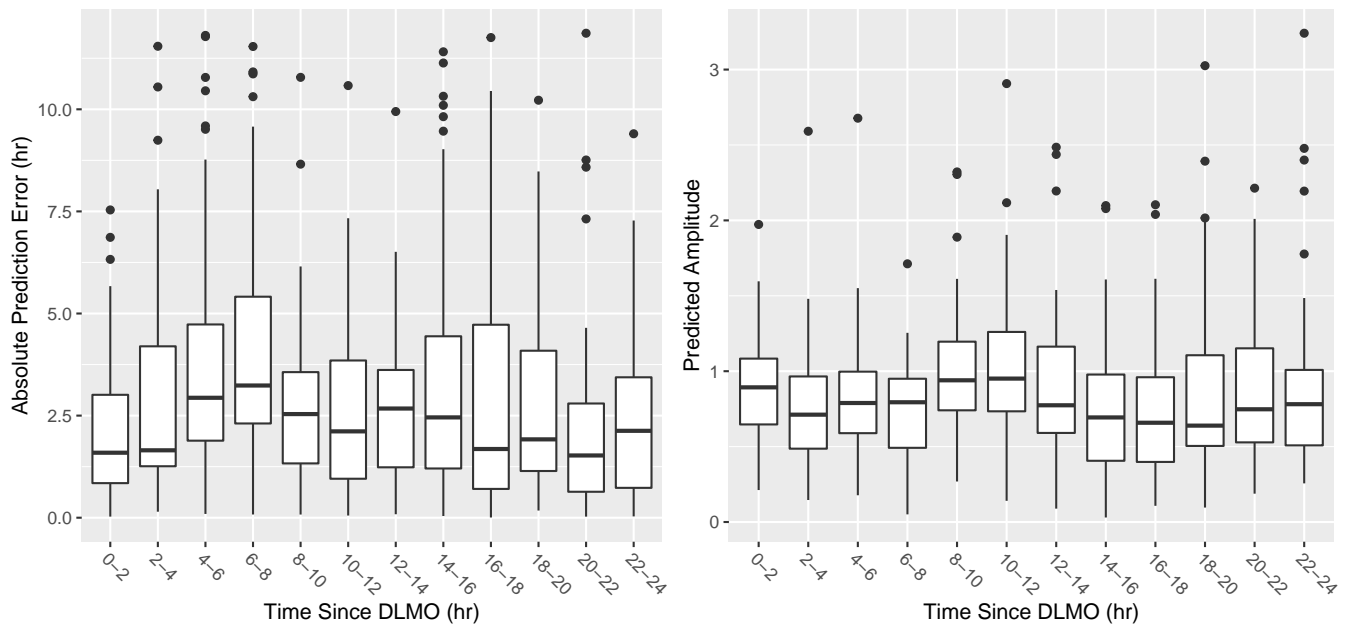

**Fig. S2.** Z-score TimeMachine's performance with respect to time.

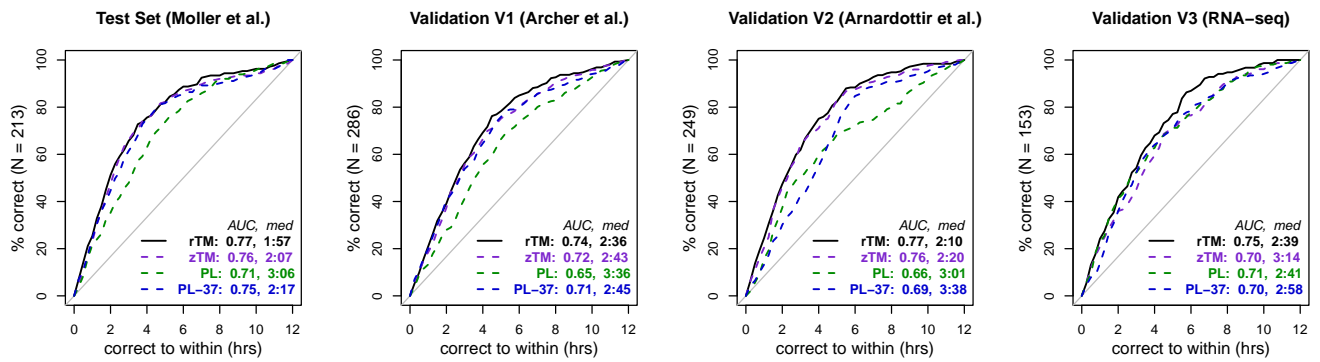

**Fig. S3.** Predictions of blood-draw time using different one-time methods, ratio TimeMachine (denoted by rTM),  $Z$ -score TimeMachine (denoted by zTM), PLSR with quantile normalization of 7615 genes (denoted by PL), and the revised PLSR model with  $Z$ -score of 37 predictor genes (denoted by PL-37).

11 **References**

- 12 1. JJ Hughey, Machine learning identifies a compact gene set for monitoring the circadian clock in human blood. *Genome*  
13 *medicine* **9**, 1–11 (2017).
- 14 2. EE Laing, et al., Blood transcriptome based biomarkers for human circadian phase. *Elife* **6**, e20214 (2017).
- 15 3. R Braun, et al., Universal method for robust detection of circadian state from gene expression. *Proc. Natl. Acad. Sci.* **115**,  
16 E9247–E9256 (2018).
- 17 4. ME Hughes, JB Hogenesch, K Kornacker, Jtk\_cycle: an efficient nonparametric algorithm for detecting rhythmic components  
18 in genome-scale data sets. *J. biological rhythms* **25**, 372–380 (2010).
- 19 5. G Wu, RC Anafi, ME Hughes, K Kornacker, JB Hogenesch, Metacycle: an integrated r package to evaluate periodicity in  
20 large scale data. *Bioinformatics* **32**, 3351–3353 (2016).
